# Supplementary material for: Association of dietary inflammatory index with serum asprosin and omentin levels in women with prediabetes
Source: PeerJ journal article supplement (doi:10.7717/peerj.19957), 2025-08-27
Supplement: Raw_data_of_the_submitted_manuscript.xlsx [file Raw_data_of_the_submitted_manuscript.xlsx]

## Sheet: article raw data 
Article title:	Association of dietary inflammatory index with serum asprosin and omentin levels in women with prediabetes
Questionnaire no	Case/Control	Age (years)	Height (m)	Body weight (kg)	Body Mass Index (BMI) (kg/m2)	Waist circumference (cm)	Hip circumference (cm)	Waist/hip ratio	Fat Mass (%)	Fat Mass (kg)	Lean Tissue Mass (kg)	Fasting blood glucose (mg/dL)	HbA1c(%) (glycated hemoglobin)	Fasting insulin (uIU/mL)	HOMA-IR (homeostatic model assessment of insulin resistance)	Total cholesterol (mg/dL)	LDL-cholesterol (mg/dL)	HDL-cholesterol (mg/dL)	Triglyceride (mg/dL)	ALT (alanine aminotransferase)(U/L)	AST (aspartate aminotransferase)(U/L)	CRP (c-reactive protein) (mg/dL)	Asprosin (ng/mL)	Omentin (pg/mL)	IL-6 (interleukin 6) (pg/mL)	TNF-alfa (tumor necrosis factor alpha) (pg/mL)	DII (dietary inflammatory index)	GI (glycemic index)	Energy (kcal/day)	Protein (g)	Fat (g)	Carbohydrate (g)	Dietary fiber (g)	Vitamin A (µg)	Vitamin E (mg)	Vitamin B6 (mg)	Total folic acid (µg)	Vitamin B12 (µg)	Vitamin C (mg)	Magnesium (mg)	Iron (mg)	Zinc (mg)	Saturated Fat (g)	MUFA (mono-unsaturated fatty acid) (g)	PUFA (poly-unsaturated fatty acid) (g)	Omega-3 fatty acid (g)	Omega-6 fatty acid (g)	Selenium (µg)	Flavan-3-ol
1	Case	35	1.77	88	28.089	106	112	0.946429	35	30.8	57.2	85	5.9	12.18	2.5563	187	132	35	215	23	27	0.18	9.995	52.16	37.92	76.53	0.241449	54.9686	1455.06	58.34	75.69	128.63	26.99	1986.95	12.38	1.92	370.5	3.48	268.82	261.88	9.14	8.23	32.87	29.06	7.8	1.3	6.42	16.17	15.0263
2	Case	46	1.59	74.4	29.4292	98	110	0.890909	38	28.3	46.1	100	6	10.125	2.5	205	131	56	62	24	21	0.477	20.08	102.5	92.81	145.6	6.96758	60.1885	707.96	30.58	40.29	53.32	11.23	456.43	5.52	0.69	161.43	2.05	55.8	132.87	5.79	3.95	16.62	16.6	4.71	0.96	3.68	5.76	6.62255
3	Case	43	1.48	73.6	33.6012	105	109	0.963303	34.4	25.3	48.3	93	6.1	9.88	2.26874	195	124	50	188	41	28	0.297	8.867	34.56	35.93	76.56	-2.53858	44.3836	3493.25	121.74	151.95	401.29	48.58	6263.86	55.52	2.78	749.76	14.92	204.63	559.96	22.21	17.49	45.32	50.7	42.62	1.71	40.7	34.03	9.77201
4	Case	44	1.6	81.6	31.875	101	120	0.841667	40.6	33.1	48.5	95	6	13.32	3.12444	183	116	51	119	12	14	0.894	8.631	49.74	40.73	89.46	1.34547	62.6913	1539.29	42.78	67	184.89	26.11	1260.88	18.09	1.45	318.12	2.06	255.03	229.04	9.51	6.75	21.48	25.04	15.01	1.07	13.88	9.41	18.1242
5	Case	24	1.57	72.6	29.4535	88	111	0.792793	32.4	23.5	49.1	77	5.8	13.28	2.52484	243	167	56	72	26	20	0.719	13.95	72.02	63.18	136.6	-0.289656	54.1501	3414.16	115.92	178.46	331.49	43.57	1037.13	45.5	2.24	485.98	4.37	158.58	556.02	20.5	15.22	50.88	64.95	50.44	4.2	46.13	90.84	16.9719
6	Case	47	1.62	70.4	26.8252	92	106	0.867925	33.5	23.6	46.8	113	6.4	8.9	2.48321	336	245	50	208	27	17	1.21	14.55	56.84	56.15	100.8	3.83644	63.5646	1924.41	110.42	112.36	113.87	20.4	1220.03	13.41	1.42	347.74	6.51	58.31	263.86	14.33	14.9	49.58	42.84	12.16	1.42	10.44	33.58	1.89646
7	Control	21	1.68	96.5	34.1908	109	138	0.789855	48.1	50.7	54.6	83	5.5	10.18	2.08627	134	76	51	61	15	16	4.22	12.09	54.66	38.3	87.43	3.44983	51.5254	916.37	57.85	31.63	92.51	17.43	893.77	5.51	1.12	265.91	3.37	156.19	204.1	8.85	7.23	13.6	11.3	3.83	0.63	3.05	18.81	3.5887
8	Control	33	1.57	78.1	31.6849	90	118	0.762712	38.8	30.3	47.8	83	5.2	3.81	0.780815	204	102	62	88	17	22	0.23	24.97	118	116.7	163.9	0.122309	36.1917	1481.04	61.11	72.66	139.85	23.87	1202.24	10.22	1.3	360.15	2.75	191.52	254.38	9.96	7.53	24.71	32.86	10.04	1.26	8.6	34.83	10.3964
9	Control	44	1.53	65.9	28.1516	92	103	0.893204	36.9	24.3	41.6	80	5.6	8.43	1.66519	209	129	55	145	30	28	0.389	9.766	50.34	34.13	82.73	-2.48899	44.2528	1841.49	71.53	89.58	181.58	31.68	2138.47	23.41	1.94	446.33	5.76	222.71	343.82	15.02	11.12	31.06	31.39	20.97	2.62	18.17	23.8	8.61443
10	Control	44	1.66	76.3	27.6891	89	122	0.729508	37.9	28.9	47.4	86	5.4	8.04	1.70726	176	102	59	120	39	23	0.32	9.543	47.24	39.5	52.78	3.32593	47.3005	1931.2	69.41	94.91	173.46	22.42	1018.51	11.11	1.07	256.49	4.36	54.96	308.61	9.47	9.74	43.15	33.03	13.45	2.22	11.15	5.03	6.21133
11	Control	33	1.52	71.8	31.0769	86	116.5	0.738197	36.6	26.3	45.5	80	5.4	4.57	0.902716	162	98	62	54	17	21	0.383	6.948	36.28	26.29	52.58	0.378624	58.4557	1476.83	56.39	64.88	160.42	26.08	886.62	11.52	1.61	341.91	2.23	133.76	265.92	11.07	8.58	24.54	24.39	11.67	1.17	10.25	18.85	7.05343
12	Case	38	1.65	93.4	34.3067	108	122	0.885246	45	42	51.4	104	6.4	10.37	2.66291	215	140	50	207	12	11	0.687	6.431	37.06	31.29	56.82	3.77466	62.8352	1405.47	42.63	46.94	197.95	22.91	673.95	14.33	0.82	213.45	1.45	60.42	197.52	8.32	5.37	16.19	14.8	11.77	0.97	10.67	10.04	13.7007
13	Control	35	1.63	75	28.2284	103	106	0.971698	39.6	29.7	45.3	89	5.5	5.82	1.27896	190	115	67	90	11	17	0.86	8.208	50.05	28.83	64.69	-2.34191	41.1679	1862.99	78.9	95.51	163.67	42.02	1585.77	27.27	1.98	564.36	2.83	270.04	400.8	18.05	11.29	28.19	27.12	34.12	5.56	28.28	33.43	21.6185
14	Control	47	1.58	69	27.6398	89	113	0.787611	34.9	24.1	44.9	87	5.5	2.77	0.595037	200	109	81	51	8	18	0.276	7.113	39.63	34.13	63.2	1.59969	55.8403	1781.16	76.17	80.48	184.81	20.45	780.47	21.27	1.21	246.69	4.04	70.36	303.19	13.18	12.98	29.74	28.35	16.52	1.12	15.21	12.1	2.77883
15	Control	43	1.69	95.1	33.2972	110	120	0.916667	44.9	42.7	52.4	82	5.3	4.58	0.927309	225	142	61	91	8	11	0.184	6.343	40.47	31.85	59.92	-2.9211	35.7909	2479.54	92.19	109.02	276.29	53.28	4157.73	29.77	2.12	596.17	3.59	180.23	526.69	23.72	14.88	35.19	40.29	24.9	2.79	21.96	8.73	11.6377
16	Control	46	1.56	79.6	32.7087	94	112	0.839286	36.9	29.4	50.2	98	5.4	5.55	1.34296	249	166	51	114	21	23	0.157	8.411	50.29	44.5	50.5	-2.99014	58.0958	1734.84	70.27	67.85	205.22	43.96	1742.62	14.61	1.56	459.4	3.47	149.44	406.07	15.78	13.08	25.88	22.79	13.58	1.9	11.53	36.72	23.3951
17	Case	47	1.57	61.7	25.0314	87	108	0.805556	29.5	18.2	43.4	104	6.1	5.51	1.41491	189	113	52	99	21	18	0.158	8.956	46.47	21.77	61.69	-1.54086	45.2832	1572.66	52.89	54.96	212.45	27.71	2370.28	18.57	1.22	297.53	5.22	138.22	280.06	12.7	8.05	14.13	21.49	14.65	1.06	13.49	44.16	12.264
18	Control	23	1.61	68.4	26.3879	83	107	0.775701	30.4	20.8	47.6	88	5.5	3.96	0.860444	209	109	90	49	15	24	0.134	11.81	65.01	39.13	95.01	0.0843104	37.103	1470.85	63.38	59.03	168.73	32.39	489.85	16.86	1.53	259.61	2.25	115.93	356.25	12.36	9.23	14.9	21.6	18.55	2.59	15.88	9.05	10.9874
19	Case	22	1.69	72.5	25.3843	80	108	0.740741	33.7	24.4	48.1	94	6.3	10.37	2.40686	192	125	50	144	17	16	0.68	22.53	98.26	87.57	192.5	2.23819	54.7905	3080.43	95.84	122.09	391.05	23.21	603.38	22.04	1.17	325.21	3.91	66.84	295.2	15.46	13.85	45.02	40.85	26.37	1.61	22.3	69.1	7.73057
20	Case	41	1.63	78.5	29.5457	95	113	0.840708	37.6	29.5	49	94	6.4	24.2	5.61679	199	138	45	291	18	15	1.24	11.35	49.07	39.32	82.84	1.84962	61.3053	1710.26	50.86	67.95	218.6	19.95	1754.49	38.48	1.05	253.86	2.66	123.4	215.25	8.84	6.57	13.12	18.54	28	0.54	27.32	16.2	0.638053
21	Control	37	1.55	80.4	33.4651	90	107	0.841121	36.1	29	51.4	89	5.1	2.69	0.591136	213	122	75	43	11	15	0.248	5.016	21.66	25.8	32.15	-1.7208	60.7735	1429.92	88.9	63.37	121.95	34.34	1438.31	14.76	1.82	425.41	5.41	182.13	361.17	14.07	9.13	21.14	27.27	10.56	1.87	8.59	12.03	2.61019
22	Case	44	1.55	60.5	25.1821	89	101	0.881188	34	20.6	39.9	123	6.4	5.86	1.7797	122	79	41	80	18	19	0.234	7.823	28.74	33.2	55.24	0.0029101	46.3373	2408.13	66.83	102.59	298.5	34.57	1449.92	18.83	1.24	358.91	2.31	138.11	353.33	13.76	9.45	26.53	42.39	26.68	2.4	24.16	23.94	6.38274
23	Case	47	1.6	69.7	27.2266	92	105	0.87619	35.7	24.9	44.8	122	5.7	5.44	1.63872	189	116	44	248	16	14	1.47	8.762	32.05	29.32	69.51	0.464142	57.6544	1478.16	57.75	60.35	170.56	24.15	1558.51	9.44	1.39	329.02	3.88	214.26	235.47	8.92	7.89	24.28	25.43	6.42	0.92	5.34	5.77	3.05204
24	Case	41	1.59	81.2	32.119	110	110	1	37.4	30.4	50.8	121	5.8	9.49	2.83528	157	98	53	65	20	23	0.277	49.25	150.1	387.2	481.7	1.11347	56.7287	1369.69	60.93	41.85	182.19	23.73	413.56	15.65	0.97	243.87	1.12	162.12	220.95	8.9	5.99	10.26	11.88	11.98	0.57	11.29	10.2	1.73028
25	Control	45	1.5	73.7	32.7556	107	107	1	36.2	26.7	47	93	5.5	8.86	2.03452	204	134	41	178	22	23	0.375	6.346	37.08	21.46	63.78	-1.90423	45.0078	2264.49	87.13	90.84	266.78	34.34	1673	21.46	1.95	563	2.83	282.24	441.31	18.19	11.16	32.47	33.52	19.48	1.23	18.06	18.34	13.1657
26	Control	20	1.56	63.2	25.9698	83	111	0.747748	33.4	21.1	42.1	83	5.1	5.48	1.12306	154	93	44	68	13	17	0.34	11.7	72.95	44.84	88.49	0.613559	43.8947	1833.48	64.59	77.8	214.52	25.64	918.38	13.31	1.42	344.61	2.82	123.68	302.55	11.39	9.03	32.48	24.42	15.26	1.54	13.64	43.65	20.9014
27	Case	40	1.56	73.3	30.12	101	106	0.95283	34.4	25.2	48.1	96	6	12.27	2.90844	238	160	62	118	48	31	0.746	17.74	76.73	80.22	130.9	0.569885	63.1482	2373.47	87	120.51	232.14	26.92	1110	19.74	1.42	336.13	5.64	102.59	345.74	13.06	13.77	45.79	46.52	20.96	2.52	18.34	46.54	13.9644
28	Case	42	1.62	88.2	33.6077	106	122	0.868852	36.8	32.5	55.7	105	6	12.13	3.14481	228	157	49	219	11	14	0.686	6.289	36.75	24.91	72.48	3.83588	59.5095	1320.98	43.21	38.27	197.09	19.7	671.79	13.51	0.58	178.91	1.75	40.71	175.91	6.36	4.75	11.31	13.88	9.65	0.53	9.01	1.64	5.76614
29	Case	40	1.66	91.7	33.2777	109	120	0.908333	41.5	38.1	53.6	89	6	13.31	2.92491	204	156	35	135	21	20	0.465	9.173	55.38	36.95	83.82	-0.547348	50.539	2193.07	66.79	94.53	262.32	32.23	1159.67	21.59	1.39	417.63	2.42	100.67	338.34	13.1	9.31	30.85	31.77	24.78	1.85	22.51	26.08	13.6907
30	Case	48	1.67	80.1	28.721	105	102	1.02941	35.8	28.7	51.4	110	6.4	33.29	9.04173	201	134	38	179	35	35	0.692	11.28	54.56	47.27	100.6	-0.15628	53.5802	2052.61	74.31	98.41	212.23	27.29	1054.9	19.87	1.6	379.41	4.55	170.64	320.65	12.59	10.09	36.67	36.3	18.69	2.02	16.45	9.85	9.93307
31	Case	41	1.53	80.2	34.2603	95	114	0.833333	36.8	29.5	50.7	108	6.1	9.2	2.45333	146	98	40	73	10	11	0.338	7.287	42.75	41.94	65.37	-0.161677	53.6819	1802.25	64.84	83.98	192.8	29.48	2534.25	21.23	1.28	366.8	5.61	250.47	282.17	11.52	8.29	32.1	25.89	18.4	1.35	16.87	15.14	14.6253
32	Case	29	1.59	74	29.271	85	113	0.752212	34.2	25.3	48.7	93	6.1	10.37	2.38126	285	171	81	175	15	14	1.16	13.18	57.48	47.74	95.6	1.25533	58.6205	2891.47	83.87	215.39	151.99	24.46	635.33	93.93	1.64	322.02	4.73	97.41	368.84	13.09	13.16	45.86	64.88	81.32	2.34	78.67	20.8	14.2323
33	Case	23	1.65	70.7	25.9688	84	116	0.724138	37.2	26.3	44.4	101	6	17.9	4.46395	130	78	44	91	28	17	1.27	78.04	269	472.6	486.5	5.12021	52.1165	1465.75	43.97	70.72	159.05	14.99	796.44	21.86	0.88	148.7	3.75	82.35	186.93	8.87	6.43	25.09	20.15	18.23	0.65	17.45	5.65	14.3819
34	Case	43	1.48	68.2	31.1359	103	110	0.936364	39.1	26.7	41.5	104	5.9	20.66	5.30528	167	101	52	130	28	17	0.651	8.733	37.93	31.25	64.84	3.4344	57.2496	2247.95	93.64	95.22	251.61	24.28	642.23	24.1	1.16	270.5	5.59	52.66	324.96	13.24	13.82	38.28	30.73	19.19	1.4	17.48	11.63	5.92604
35	Control	34	1.59	76.8	30.3785	91	111	0.81982	33.6	25.8	51	72	5.4	10.61	1.88622	148	100	34	72	25	16	0.587	12.06	66.73	46.63	81.66	-1.21803	44.3476	1369.12	50.51	60.14	148.67	27.77	982.71	15.33	1.41	334.75	2.58	178.88	293.3	11.87	8.31	20.51	27.35	7.54	1.12	6.4	16.86	17.3176
36	Case	37	1.63	83.9	31.5782	107	110	0.972727	33.4	28	55.9	98	6	7.22	1.74706	190	123	49	189	23	19	0.332	8.771	48.16	30.58	66.06	1.9813	63.3325	1991.89	75.24	78.18	241.26	33.35	845.14	15.39	1.01	323.93	2.47	93.62	327.46	13.44	9.88	30.4	27.68	12.62	0.87	11.51	24.38	2.49809
37	Case	43	1.65	90	33.0579	100	119	0.840336	40.7	36.6	53.4	99	6.1	7	1.71111	221	153	44	212	42	24	0.967	7.566	34.25	27.99	56.2	1.75145	52.8064	2074.3	115.92	90.86	194.07	22.81	1648.09	14.61	1.33	263.89	9.81	77.34	244.35	12.18	14.36	33.82	31.86	14.97	1.33	13.51	45.17	8.74739
38	Control	40	1.67	71.9	25.7808	85	113	0.752212	36	25.9	46	88	5.4	2.72	0.591012	207	132	57	57	9	12	0.145	5.304	54.16	21.74	63.2	-2.331	56.867	2309.8	97.85	118.49	207.71	33.06	2220.11	41.7	2.32	408.29	4.79	129.3	478.64	16.67	14.71	31.83	46.17	32.55	3.02	29.4	10.45	6.68408
39	Control	42	1.55	73.2	30.4683	86	110	0.781818	35.5	26	47.2	96	5.4	4.58	1.08563	151	87	54	46	13	15	0.184	6.711	47.83	23.25	59.69	-1.68271	50.6348	1996.68	83.02	116.67	150.49	30.06	1269.16	22.36	1.62	377.26	4.37	149.06	400.84	13.73	11.62	42.18	45.88	22.25	3.35	18.8	6.77	12.3592
40	Control	38	1.63	68.8	25.8948	86	112	0.767857	31.3	21.5	47.3	80	5.2	7.32	1.44593	173	107	64	79	12	15	0.245	10	65.72	27.46	69.94	-3.6829	59.9931	2322.67	108.81	77.52	286.33	53.36	3586.26	28.07	2.74	630.44	3.56	295.69	508.43	21.28	14.75	23.22	24.8	23.5	2.5	20.81	17.26	17.6049
41	Control	33	1.65	86.5	31.7723	98	116	0.844828	37.5	32.4	54.1	84	5.2	5.92	1.22785	188	136	51	91	20	15	0.141	6.612	50.29	23.04	48.84	-0.985979	47.1275	1550.65	64.49	63.54	174.87	29.17	1106.36	15.45	1.51	331.64	3.77	137.15	333.63	12.39	10.33	21.31	23.24	14.17	1.35	12.72	7.05	10.2018
42	Control	44	1.6	78.5	30.6641	91	120	0.758333	39.9	31.3	47.2	93	5.3	5.58	1.28133	202	128	59	95	13	13	0.164	5.074	48.14	19.92	56.11	-0.417369	56.8675	1728.47	71.17	76.01	198.39	31.68	1116.91	18.35	1.51	436.26	2.57	113.24	326.64	14.59	9.63	21.35	23.98	18.11	1.97	15.81	44.69	6.88971
43	Control	41	1.66	69	25.0399	81	105	0.771429	32.7	22.3	45.9	77	5.4	1.88	0.357432	155	97	51	86	15	16	0.276	5.148	40.43	24.42	52.18	-1.33595	53.1913	1452.12	53.38	68.35	149.74	37.36	1269.9	17.7	1.57	342.29	1.72	186.57	341.56	13.16	8.51	22.75	25.23	15.97	2.62	13.21	12.92	12.197
44	Control	40	1.61	66.6	25.6935	82	109	0.752294	29.3	19.5	47.1	82	5.2	2.72	0.550716	151	87	54	46	8	13	0.145	10.81	65.97	31.55	58.81	-3.91608	37.6052	1829.44	93.71	81.28	171.68	53.02	2140.14	25.97	3.16	688.46	2.73	630.84	483.34	20.09	12.5	22.96	31.6	20.6	3.03	17.29	25.84	11.1508
45	Control	40	1.58	65.9	26.398	81	109	0.743119	31.1	20.5	45.4	86	5.4	6.51	1.38237	214	112	110	49	23	23	0.154	10.03	59.7	37.32	70.34	-3.58602	32.1857	1989.95	89.2	92.91	193.68	42.09	1693.1	28.31	2.16	565.38	3.63	287.58	573.37	18.52	12.96	23.47	40.29	23.07	3.12	19.79	13.08	11.3066
46	Case	22	1.67	71	25.4581	100	107	0.934579	39.6	28.1	42.9	112	6.3	28.7	7.93679	237	156	67	93	19	12	0.632	70.94	326.1	298.6	477.4	6.16778	60.4722	1155.26	46.01	47.96	131.03	14.79	473.58	7.34	0.73	183.06	2.52	53.03	177.41	5.9	5.25	19.82	18.78	6.19	1	5.09	6.25	3.47216
47	Control	40	1.58	69.8	27.9603	90	107	0.841121	30.5	21.3	48.5	80	5.2	7.12	1.40642	198	124	70	54	25	26	0.342	21.31	137.4	90.75	145.4	-2.54813	44.4365	2526.33	111.91	113.86	254.43	50.44	2475.93	26.66	2.58	723.89	8.79	210.83	535.59	22	17.95	35.61	55.17	16.32	2.26	13.81	15.36	6.66051
48	Control	42	1.68	82.4	29.195	98	119	0.823529	33.3	27.4	55	85	4.8	6.67	1.39988	156	109	40	111	9	15	0.421	7.17	47.33	36.35	45.41	-1.41866	62.6516	1986.26	76.12	76.49	241.42	29.04	1099.18	13.31	1.79	364.19	3.38	211	317.78	11.91	10.22	27.5	32.79	11.5	1.9	9.47	6.47	6.85046
49	Control	46	1.55	82.7	34.4225	113	117	0.965812	42.9	35.5	47.2	86	5.5	3.14	0.666765	194	113	65	42	13	18	0.163	6.822	56.35	31.23	53.08	-2.3942	43.6948	2696.24	117.97	121.42	275.15	39.86	1650.01	17.73	2.52	527.12	7.56	177.21	546.56	19.04	18.76	49.23	42.44	21.84	3.26	18.27	16.06	6.56425
50	Control	37	1.58	66.1	26.4781	86	106	0.811321	33.4	22.1	44	89	5	6.66	1.46356	157	93	56	64	8	13	0.453	12.37	75.66	41.99	46.78	-3.64619	63.808	2324.76	108.26	77.96	284.74	48.47	1798.65	21.24	2.79	584.16	4.28	616.54	538.21	27.66	12.77	23.88	29.75	17.59	3.18	14.22	16.51	4.83207
51	Case	39	1.62	66.4	25.301	88	108	0.814815	28.6	19	47.4	101	5.7	28.17	7.02511	198	129	53	141	19	21	0.203	12.84	70.71	53.74	94.41	4.59927	65.999	1511.02	55.8	66.59	168.81	15.46	1381.71	16.45	0.8	205.6	4.5	47.1	197.09	9.07	6.78	24.57	19.62	16.72	1.09	15.51	11.46	1.29244
52	Case	34	1.65	70.7	25.9688	84	116	0.724138	37.2	26.3	44.4	110	5.7	15.58	4.2316	192	130	53	160	24	19	0.698	50.47	215.7	240.8	333	2.63702	59.7814	1485	72.34	72.64	128.96	21.02	957.36	18.89	0.95	247.45	3.02	67.9	248.41	11.52	8.24	20.95	26.84	15.11	0.9	13.98	58.17	3.15697
53	Control	47	1.6	81.1	31.6797	112	114	0.982456	35.5	28.8	52.3	95	5.4	6.35	1.48951	208	123	71	80	17	18	0.151	12.49	74.22	24.67	66.5	-0.504314	44.4478	1540.65	72.96	73.18	141.12	29.57	1453.21	12.88	1.79	377.1	5.32	152.45	314.36	13.65	13.26	27.64	28.17	12.44	1.8	10.52	11.19	8.7093
54	Control	23	1.55	80.4	33.4651	80	98	0.816327	36.1	29	51.4	82	4.3	8.72	1.76553	175	106	53	74	30	21	0.487	9.385	75.59	36.43	54.82	-0.543966	60.2256	1664.75	72.51	70.24	179.58	27.73	1402.04	21.24	1.87	376.27	4.11	209.98	308.14	12.97	10.3	20.17	24.32	20.53	2.07	18.29	12.39	3.91742
55	Case	44	1.57	65.8	26.6948	92	101	0.910891	31.2	20.5	45.3	104	6	7.75	1.99012	222	141	49	103	22	15	0.581	45.95	272.1	204.4	354.5	0.21426	63.1522	1782.01	70.84	78.64	185.76	22.39	1396.96	15.18	1.19	273.2	4.73	94.39	331.96	10.71	9.84	25.88	29.18	19.17	2.71	16.36	5.24	2.77883
56	Case	49	1.56	74.3	30.5309	94	107	0.878505	35.1	26.1	48.2	122	5.9	17.28	5.20533	246	158	62	283	30	23	5.66	33.86	172.9	144.3	307.2	2.2888	45.2939	1783.74	65.82	89.75	174.59	19.93	1110.89	12.09	1.25	284.82	4.04	146.06	253.09	9.91	9.98	42.24	30.24	11.56	1.38	10.09	20.45	4.5781
57	Case	34	1.56	80.2	32.9553	104	113	0.920354	37.3	29.9	50.3	104	5.9	9.9	2.54222	188	126	54	93	26	26	0.894	13.78	64.77	41.29	73.04	1.61416	61.7329	3276.39	96.62	160.43	357.07	35.95	2029.76	24.44	1.67	339.06	4.42	129.45	446.76	16.18	14.23	53.76	60.61	34.62	2.78	31.72	11.34	5.81078
58	Control	45	1.66	70	25.4028	87	104	0.836538	26.1	17.7	50	84	5.5	5.69	1.18015	187	120	59	51	22	18	0.341	10.7	73.86	37.52	52.12	-3.21997	60.2335	2029.97	99.78	68.53	244.52	39.75	1747.45	22.02	2.37	549.1	3.52	252.55	446.91	17.77	13.5	22.8	22.46	18.48	2.25	16.04	16.32	9.96259
59	Control	24	1.59	79.2	31.3279	90	113	0.79646	37.1	29.4	49.8	88	5	4.17	0.906074	168	101	57	72	11	17	0.164	14.09	132.1	47.76	92.44	-3.44226	47.6082	2049.48	98.49	101.62	176.91	50.43	2028.76	28.93	3.15	647.27	2.96	601.57	525.46	19.66	13.01	28	45.8	20.15	3.06	16.8	25.84	12.5535
60	Case	46	1.62	90.9	34.6365	109	118	0.923729	39.2	35.6	55.3	101	6	7.83	1.95267	197	133	58	138	27	28	4.44	11.42	53.04	30.46	66	0.482615	54.3144	2589.19	79.71	142.13	242	24.88	1591.59	24.62	1.44	396.9	4.57	155.83	345.81	12.78	11.46	58.86	44.32	29.25	3.03	25.93	39.2	4.57599
[truncated: 6 more columns]
